# Supplementary material
Source: PubMed Central journal article supplement (PMC2643830)
Supplement: supp_29_5_1123__1.pdf [file supp_29_5_1123__1.pdf]

**Supplemental Material - Kininis *et al.* (2009)**

***“Post-recruitment Regulation of RNA Polymerase II Directs Rapid Signaling Responses at the Promoters of Estrogen Target Genes”***

**List of Supplemental Material**

|                                            |    |
|--------------------------------------------|----|
| 1) Supplemental Materials and Methods..... | 2  |
| 2) Supplemental Figures .....              | 6  |
| 3) Supplemental Reference .....            | 13 |

**1. Supplemental Materials and Methods*****ChIP-qPCR***

The sequences of the primers used for the ChIP-qPCR analyses are as follows:

|                        |                         |
|------------------------|-------------------------|
| CASC5 TSS forward      | TCACCTAGGCGGTTAGATTTG   |
| CASC5 TSS reverse      | CAGACTTGTTTGGGGTCCA     |
| CASC5 +1 kb forward    | TTTCACTTCCGTCGAATCCT    |
| CASC5 +1 kb reverse    | CCCCTCTAGGTTTGGGAATC    |
| CEBPB TSS forward      | GGCCGCCCTTATAAATAACC    |
| CEBPB TSS reverse      | CGGCTCTGACTCGCTAAAGT    |
| CEBPB +1 kbb forward   | CAGCGACGAGTACAAGATCC    |
| CEBPB +1 kbb reverse   | AGCTGCTCCACCTTCTTCTG    |
| CSH1 TSS forward       | TAAAAAGGGCCCACAAGAGA    |
| CSH1 TSS reverse       | GATTTTAGGGGCGCTTACCT    |
| CSH1 +1 kb forward     | GGAGCTGGTCTCCAGCATAG    |
| CSH1 +1 kb reverse     | GTTGGAGGGTGTCCGAATAG    |
| CYP1B1 TSS forward     | CGTGCGGCCTCGATTG        |
| CYP1B1 TSS reverse     | AGGTGCCACGTTTCCATT      |
| CYP1B1 +1 kb forward   | CTCCGTCCCCATCCCAAT      |
| CYP1B1 +1 kb reverse   | TGCCCTCACTGGAAGCTTAAAC  |
| ETV3 TSS forward       | TCTGCTGAGGATGGAAGTGA    |
| ETV3 TSS reverse       | CGGATCCAACCCAGACAC      |
| ETV3 +1 kb forward     | TTAAGAGTCCAGGGCAGCTT    |
| ETV3 +1 kb reverse     | GGAGCTTCCTCTTCCACCTT    |
| GREB1 TSS forward      | GCCAAATGGAAGAAGGACAG    |
| GREB1 TSS reverse      | ACCACCTACCTCCAGTCACC    |
| GREB1 +1 kb forward    | CCAGATCAACAGGCTCACC     |
| GREB1 +1 kb reverse    | AACCAACCAATCACTGAGC     |
| HNRPA1 TSS forward     | AAAGAGAGGGCGAAGGTAGG    |
| HNRPA1 TSS reverse     | GGCAGGGTGAAGAGAGACTTT   |
| HNRPA1 +1 kb forward   | GCTCACGACTGTGTGGTAA     |
| HNRPA1 +1 kb reverse   | TCAAAGCAGGACGTTCCCTT    |
| MYC TSS forward        | AGGCTTGCGGGAAAAG        |
| MYC TSS reverse        | CGCTGGAATTACTACAGCGAGTT |
| MYC downstream forward | GGACCCGCTTCTCTGAAAGG    |
| MYC downstream reverse | GACTTCGGTGCTTACCTGGTTT  |
| NTNG1 TSS forward      | CGCACAGGTCTCGAGGTAG     |
| NTNG1 TSS reverse      | GCCAGCAAGTGAAGGATAG     |
| NTNG1 +1 kb forward    | AAGGCGAGAAGTGTCAGAGG    |
| NTNG1 +1 kb reverse    | TGCTCTCCCTCCAAAATA      |
| PGAM2 TSS forward      | TCCTCTGTGGTCCCTGCT      |
| PGAM2 TSS reverse      | TCCCCTTTTCACTCAGCTCT    |
| PGAM2 +1 kb forward    | CATTGTCAAGCACCTGGAAG    |
| PGAM2 +1 kb reverse    | GCTTCTCAGCCCTCCTTTT     |
| PMAIP1 TSS forward     | ACTGGACAAAAGCGTGGTCT    |
| PMAIP1 TSS reverse     | CGGAGATGCCAACTACACAC    |
| PMAIP1 +1 kb forward   | TGTGACCATGCCTAAGTTGG    |

|                      |                          |
|----------------------|--------------------------|
| PMAIP1 +1 kb reverse | AAAGCTTTTTCCATCCCACA     |
| RPS18 TSS forward    | CGTCACTTCCGCTCTCTCTT     |
| RPS18 TSS reverse    | GACGTTTCCAGAACCCTGAC     |
| RPS18 +1 kb forward  | CCAGATCACCTTGACTGCTG     |
| RPS18 +1 kb reverse  | ATTCGGGTGAGCAACCATAC     |
| SIAH2 TSS forward    | CCTGAAGTTGCCTTTCTCGT     |
| SIAH2 TSS reverse    | TTGTCTTTTCTGGGTGAGGA     |
| SIAH2 +1 kb forward  | TGGCATTGCTGATCGTTAG      |
| SIAH2 +1 kb reverse  | CTCCTCAATCCCCACACAGT     |
| TFF1 TSS forward     | CCTGGATTAAGGTCAGGTTGGA   |
| TFF1 TSS reverse     | TCTTGGCTGAGGGATCTGAGA    |
| TFF1 +1 kb forward   | GAGTCAAAGCCACCTCTCTCATG  |
| TFF1 +1 kb reverse   | CCACTTGACAACACCAGGGAAT   |
| TTC26 TSS forward    | GGGTACCGTGGAGACAGAA      |
| TTC26 TSS reverse    | ACCATCTTGACGTCGGTCTT     |
| TTC26 +1 kb forward  | AATCAGAATTGGACCATACAGC   |
| TTC26 +1 kb reverse  | TCTTCTTTCTTTTGTTCAGTGTGC |

### *Gene Expression qPCR Analyses*

The sequences of the primers used for the real-time PCR analyses were:

|                |                             |
|----------------|-----------------------------|
| ACTB forward   | AGCTACGAGCTGCCTGAC          |
| ACTB reverse   | AAGGTAGTTTCGTGGATGC         |
| CASC5 forward  | TGTACCAAAGGTTTAAGTAATAGGACA |
| CASC5 reverse  | GGGAAAATGGCTAATGTTCTTG      |
| CEBPB forward  | TTTCGAAGTTGATGCAATCG        |
| CEBPB reverse  | CAACAAGCCCGTAGGAACAT        |
| CSH1 forward   | TACGGGCTGCTCTACTGCTT        |
| CSH1 reverse   | ATGCTACTCGGGCACCTAGA        |
| CYP1B1 forward | AACGTACCGGCCACTATC          |
| CYP1B1 reverse | CACGACCTGATCCAATTC          |
| ETV3 forward   | CCCCACATTCTCTCTTGATG        |
| ETV3 reverse   | TGCTCAGATAAGGGGAACACTG      |
| GREB1 forward  | GTGGTAGCCGAGTGGACAAT        |
| GREB1 reverse  | ATTTGTTTCCAGCCCTCCTT        |
| HNRPA1 forward | TTCCAGCAGCAGCAGTAGC         |
| HNRPA1 reverse | GTGCTTGGCTGAGTTCACAA        |
| HOXC5 forward  | GACCCCAGCAAGTGGTCCTA        |
| HOXC5 reverse  | GGGTCAGGAGGGCACAGA          |
| KRT13 forward  | ACGCCAAGATGATTGGTTTC        |
| KRT13 reverse  | CGACCAGAGGCATTAGAGGT        |
| MDM2 forward   | CATTGTCCATGGCAAACAG         |
| MDM2 reverse   | CATACTGGGCAGGGCTTATT        |
| MYC forward    | GGATTTTTTTTCGGGTAGTGGAA     |
| MYC reverse    | TCCTGTTGGTGAAGCTAACGTT      |
| PMAIP1 forward | GTTTTTGCCGAAGATTACCG        |
| PMAIP2 reverse | CAATGTGCTGAGTTGGCACT        |
| RPS18 forward  | GGATGGAAAATACAGCCAGGT       |
| RPS18 reverse  | AGAAGTGACGCAGCCCTCTA        |

|               |                        |
|---------------|------------------------|
| SIAH2 forward | GTTCGATTCATGACGGTGTG   |
| SIAH2 reverse | AAAACAAGGCAGTCGCTGTT   |
| STC2 forward  | TAACAGGCTCCCAGCTGAAT   |
| STC2 reverse  | CAGGTTGCCTTGAGGAAGAG   |
| TBP forward   | AGACCATTCGACTTCGTG     |
| TBP reverse   | AAATCAGTGCCGTGGTTC     |
| TTC26 forward | GAAGCACAGGTAACACCCAAG  |
| TTC26 reverse | CTAGGACGCTGGCGCTATT    |
| TFF1 forward  | TGCTTCTATCCTAATACCATCG |
| TFF1 reverse  | AGATCCCTGCAGAAGTGTC    |

### ***Nuclear Run-on Assays***

The isolation of nuclei, nuclear run-on reactions, and hybridization to membrane-bound oligonucleotides were carried out largely as described previously (1), with some modifications.

***Isolation of nuclei:*** Nuclei were isolated from MCF-7 cells grown in 15 cm diameter plates ( $\sim 1 \times 10^7$  cells at  $\sim 80\%$  confluence) as follows. The cells were washed on the plate three times with ice cold PBS. The cells were then collected from the plate and lysis was initiated in 10 ml of ice cold lysis buffer (10 mM Tris•HCl pH 7.5, 2 mM MgCl<sub>2</sub>, 3 mM CaCl<sub>2</sub>, 0.5% NP-40, 10% glycerol, 2 units/ml SUPERase-In RNase inhibitor from Ambion). The cells were then transferred to a 15 ml conical tube and centrifuged for 10 min at 900 x g at 4°C in a clinical centrifuge. The resulting cell pellets were resuspended in 1 ml of lysis buffer by pipetting up and down to complete the cell lysis and release the nuclei. The volume was brought to 10 ml and the nuclei were washed, pelleted, resuspended in 1 ml of freezing buffer (50 mM Tris•Cl pH 8.3, 40% glycerol, 5 mM MgCl<sub>2</sub>, 0.1 mM EDTA), frozen in liq N<sub>2</sub>, and stored at -80°C.

***Nuclear run-on reactions:*** For the nuclear run-on reactions,  $\sim 3.5 \times 10^7$  MCF-7 cell nuclei (100  $\mu$ l of the aforementioned preparations) were mixed with an equal volume of reaction buffer (10 mM Tris•HCl pH 8.0; 5 mM MgCl<sub>2</sub>; 1 mM DTT; 300 mM KCl; 20 units of SUPERase-In; 1% sarkosyl; 500  $\mu$ M each of ATP, GTP, and UTP; 10  $\mu$ M CTP; and 1.0  $\mu$ M  $\alpha$ -<sup>32</sup>P-CTP 3000 Ci/mmol). The reactions were incubated for 5 min at 30°C, followed by the addition of 23  $\mu$ l of 10x DNase I buffer (supplied by the manufacturer), and 10  $\mu$ l RNase free DNase I (Promega). Proteins were digested by the addition of an equal volume of Buffer S (20 mM Tris•HCl pH 7.4, 2% SDS, 10mM EDTA, 200  $\mu$ g/ml Proteinase K from Invitrogen), followed by incubation at 55°C for 1 hour. The RNA was extracted twice with acid phenol:chloroform (5:1) and once with chloroform, and then precipitated at a final concentration of 300 mM NaCl with 3 volumes of -20°C ethanol. The RNA pellet was washed in 75% ethanol and then dissolved in 20  $\mu$ l of DEPC-treated water. The RNA was base hydrolyzed by the addition of 5  $\mu$ l of 1 M NaOH with incubation on ice for 10 min. The reaction was neutralized by the addition of 25  $\mu$ l of 1M Tris•HCl pH 6.8. The reaction was then run twice through a Bio-Gel P-30 RNase-free spin column (BioRad) according to the manufacturer's instructions. Before proceeding with the hybridization to the membrane, DNA was further removed by another digestion with RNase-free DNase I for 10 min at 37°C and the reaction was stopped by the addition of 10 mM EDTA.

***Probe immobilization and hybridization:*** Single-stranded oligonucleotides (500 picomoles) were dT-tailed with 10 units of terminal transferase in 1x NEB buffer 4, 0.25 mM CoCl<sub>2</sub>, and 500  $\mu$ M TTP in a 25  $\mu$ l reaction. These reaction conditions add a homopolymer tail of  $\sim 10$  to 20 bases. The reaction was stopped and the oligonucleotides were denatured by the addition of 75  $\mu$ l of 0.4 M KOH, 10 mM EDTA with incubation at 65°C for 5 min. The

oligonucleotides were spotted onto positively charged nylon membrane (GeneScreen Plus, Pall) using a slot blotting apparatus (Minifold I, Whatman), fixed to the membrane by UV irradiation at 120 mJ/cm<sup>2</sup>, and dried at 80°C for 1 hour. Prior to hybridization, the membranes were rehydrated in water for 5 min, followed by a 5 min incubation with 2x SSPE. Prehybridization was carried out overnight in 500 µl/cm<sup>2</sup> of Church buffer at 68°C in hybridization bottles. Nuclear run-on RNA was denatured by heating to 95°C for 5 min, quenched on ice for 2 min, and then added to the membranes in 100 µl/cm<sup>2</sup> of Church buffer. Hybridization was carried out for 24 hours. The membranes were washed once at 58°C in 2x SSPE, 0.5% SDS for 20 minutes, and once 58°C in 0.5x SSPE, 0.5% SDS for 20 minutes, followed by a brief rinse in 2x SSPE. The membranes were exposed to phosphorimaging screens (Molecular Dynamics) and the digital images were visualized on a Typhoon 9400 variable mode imager.

The oligonucleotides used were as follows:

|          |                                                              |
|----------|--------------------------------------------------------------|
| MYC-P1   | GCCGTCCAGACCCTCGCATTATAAAGGGCCGGTGGGCGGAGATTAGCGAGAGAGG      |
| MYC-P2   | TCTAAGCAGCTGCAAGGAGAGCCTTTCAGAGAAGCGGGTCCTGGCAGCGGCGGGGAAGTG |
| MYC-P3   | ACCAAGGGTAGCAGCTGTTCTGGAACCGCCAGAGCCCCGCTCCTCGCAGTTCCTC      |
| MYC-P4   | GGCTGCAAACATGGGCAGTCTAAGGGGAAGGGATGGGAGGAAACGCTAAAGCCCA      |
| SIAH2-P1 | AAGAGGGCGAAGCGGCCACCCGCTTCTGTGTTTCGGAGTCAGGACGAGAAGCATTG     |
| SIAH2-P2 | CCTGCTCGGGCTGCGGGCCGGGCTGCGCCAGTGAGCATGCCTGGCTCGCTGCAGC      |
| SIAH2-P3 | GTGCGCAGAGCCCTGGCCACCCGCTTCTGGAACAGCCGCTGACGCAAGCCCCGG       |
| SIAH2-P4 | CAACCAAAGGTGAGGGACACACACCCAGCTTTATACAACCTCACACACATGCACA      |
| TFF1-P1  | CCCGAGTCAGGGATGAGAGGCCCGCCGAGCCCCGATTTTATAGGGCAGGCTCTGTTTGC  |
| TFF1-P2  | CCAGCATGGACACCAGGACCAGGGCGCAGATCACCTTGTCTCCATGGTGGCCATTGCC   |
| TFF1-P3  | CCTAACACAGGAAAACAGCCCCGACTGAAGGCAGCCCCCTCCTCGTCGCACTTCT      |
| TFF1-P4  | GGACATGAGAGGGAGACGTGGTCTCACATCCTGATGTGCAAACATTACGCTCAGGGAAA  |
| KRT13-P1 | GGCCGAGGACTGTGGCTCTTCCCAGAGTGGACACCTTTTATACACCTCCATAGGGGCTG  |
| KRT13-P2 | ACAAACCGAGTTGAACAGGTAGAGACACCACGGCCTCCTCCAGCTGGCAAGAGC       |
| KRT13-P3 | TCTGCTCCAACAGGCTGGTATCACAGCACAACAGACAGGGCTCAACAAAGGGCACC     |
| KRT13-P4 | TTCTGGAGAGTGTTCAGGTCCCACAGTGGAGGACTGTGTCCAGTTGCAGGGGAGGGCT   |

**2. Supplemental Figures**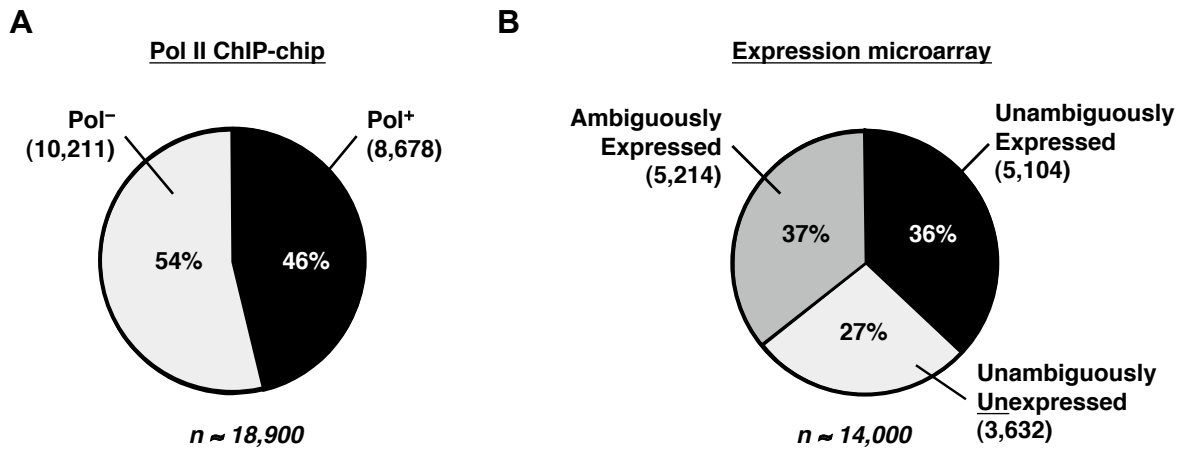**Supplemental Figure 1. Genome-wide analysis of Pol II binding and gene expression.**

(A) Pol II ChIP-chip revealed that about half of the promoters analyzed (8,678 out of ~18,900) were bound by Pol II in MCF-7 cells grown under basal estrogen-free growth conditions.

(B) Gene expression microarray analysis defined 5,104 unambiguously expressed and 3,632 unambiguously unexpressed genes (see Methods for details on the criteria used). About 37% of the genes analyzed (5,214 out of ~14,000) had ambiguous expression status and were eliminated from further analyses presented in Fig. 1.

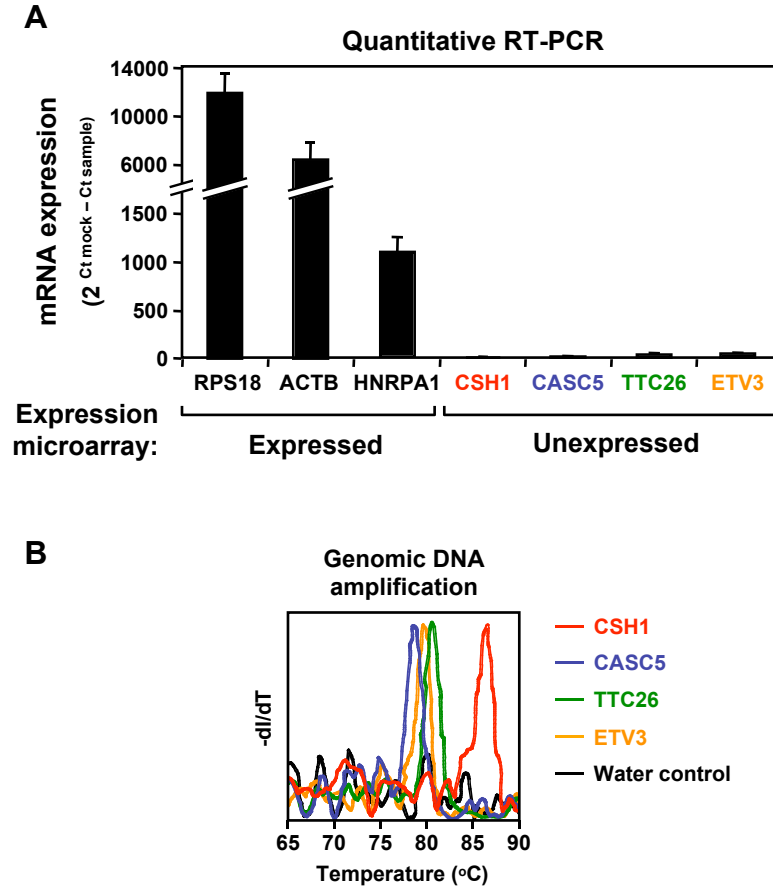

**Supplemental Figure 2. Gene expression microarray results are consistent with quantitative RT-PCR data.**

(A) Gene-specific analysis of mRNA expression for representative “expressed” and “unexpressed” genes from expression microarray analyses. Gene expression was quantified as fold mRNA expression of each gene over mock control ( $2^{Ct_{mock} - Ct_{sample}}$ ). Each bar represents the mean plus SEM,  $n = 4$ .

(B) Melting curves of genomic DNA amplification by the same primers as used in (A). All primers efficiently amplify the genomic DNA indicating that a lack of a signal in (A) is not due to failed primer sets.

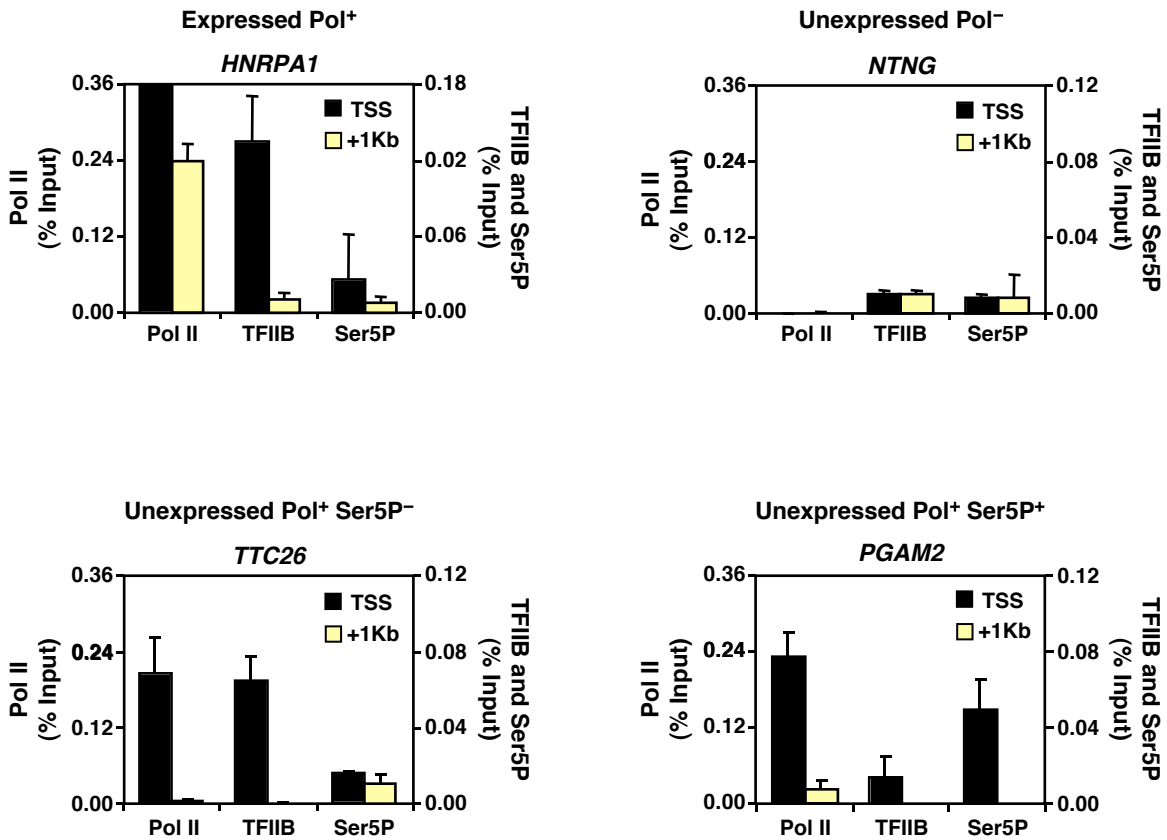

**Supplemental Figure 3. Analysis of Pol II, TFIIB, and Ser5-phosphorylated Pol II CTD binding at expressed and unexpressed genes.**

Gene-specific ChIP analyses of Pol II, TFIIB, and Ser5P binding at TSSs (black) and downstream regions (+1 kb) (yellow) for a set of representative genes. Each bar represents the mean plus the SEM from at least three independent experiments.



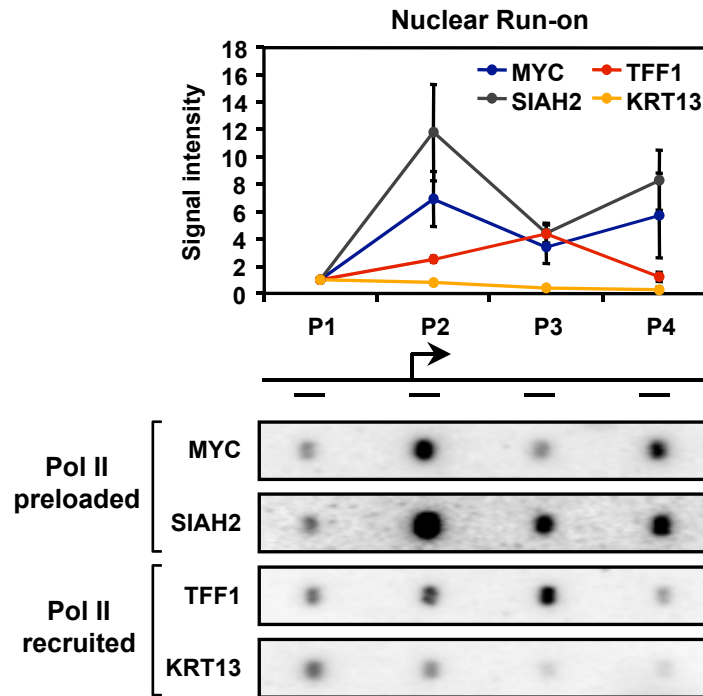

**Supplemental Figure 4. Nuclear Run-on analysis of representative E2-stimulated Pol II preloaded and Pol II recruited genes prior to E2 treatment.**

Gene-specific nuclear run-on analysis of Pol II preloaded (MYC and SIAH2) and Pol II recruited (TFF1 and KRT13) genes in the absence of E2. Quantification of results shows that the Pol II preloaded genes contain significantly more transcriptionally-poised Pol II at the TSS, compared to Pol II recruited genes. Each data point represents the mean  $\pm$  SEM from at least three independent experiments.

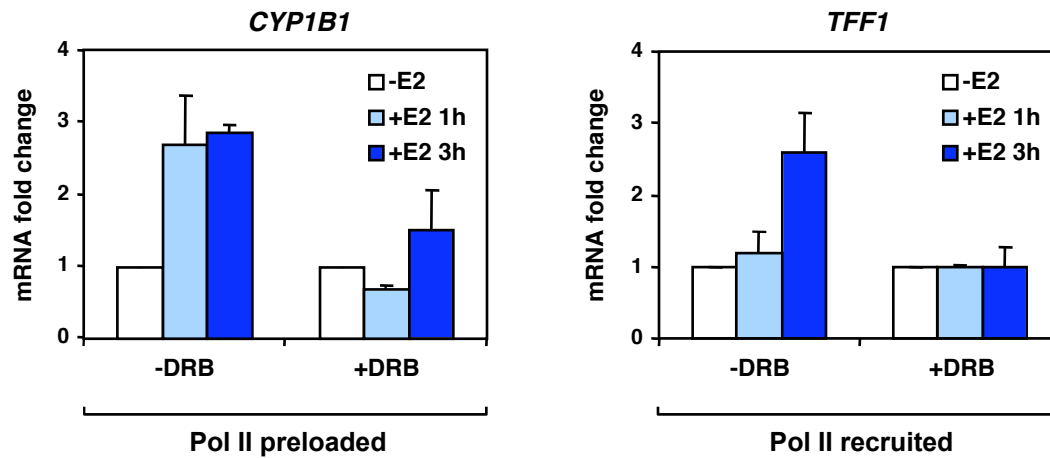

**Supplemental Figure 5. Inhibition of Cdk9 kinase activity by DRB blocks the E2-dependent induction of representative Pol II preloaded and Pol II recruited genes.**

Gene-specific analysis of mRNA expression for representative Pol II preloaded (*CYP1B1*) and Pol II recruited (*TFF1*) genes in MCF-7 cells before or after E2 treatment for 1, 3, and 6 hours. Fold change is shown relative to the "-E2" condition for each gene. Each bar represents the mean plus SEM,  $n \geq 3$ .

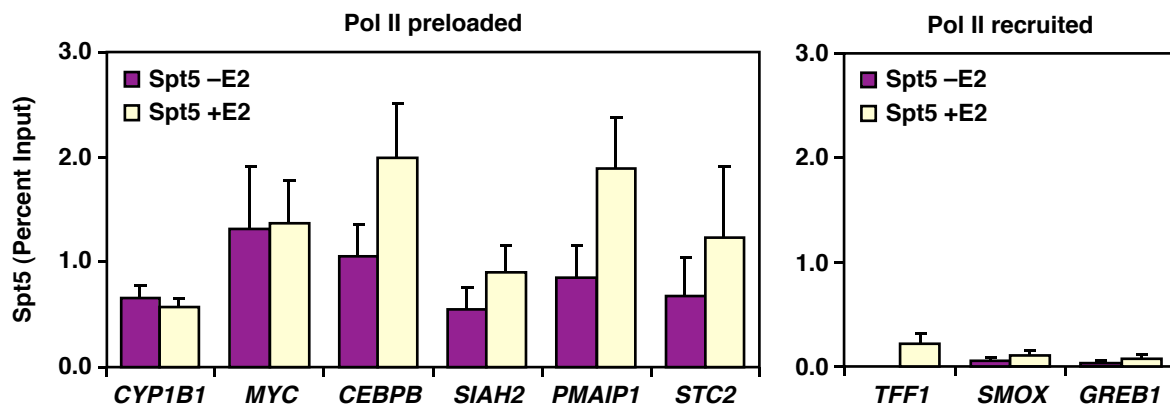

**Supplemental Figure 6. DSIF binds at the promoters of E2-stimulated genes with preloaded Pol II, but not with recruited Pol II, prior to E2 treatment.**

Gene-specific ChIP analysis of SPT5 binding at promoters of representative E2-stimulated genes  $\pm$  E2 (45 min.). Each bar represents the mean plus the SEM from at least three independent experiments.

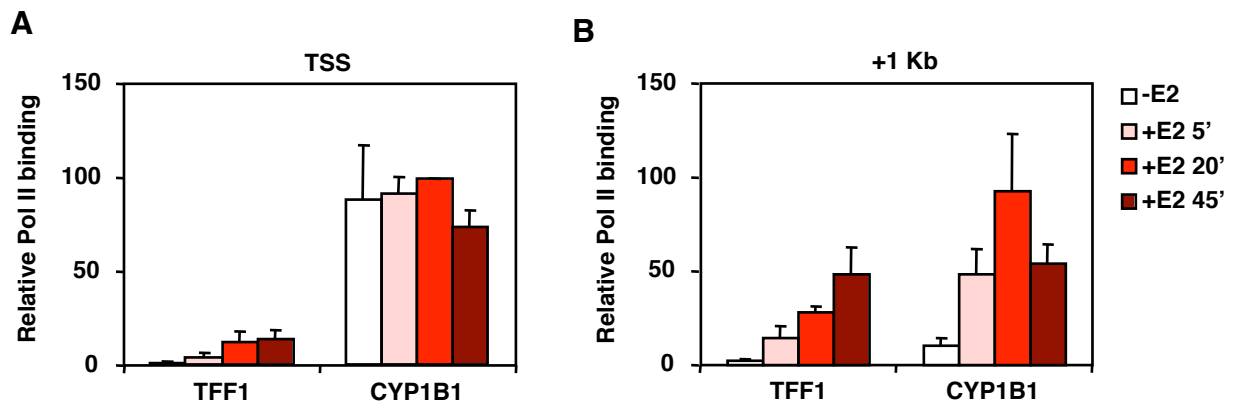

**Supplemental Figure 7. Kinetics of Pol II binding for the *TFF1* ("Pol II recruited") and *CYP1B1* ("Pol II preloaded") genes.**

ChIP analysis of Pol II binding at the TSS (A) and +1 Kb (B) regions of *TFF1* (Pol II recruited) and *CYP1B1* (Pol II preloaded) genes before and after 5, 20 and 45 min. treatments with E2. The data from two independent experiments were scaled so that the Pol II signal at the *CYP1B1* TSS after 20 min. of E2 treatment was set to 100 for each experiment. Each bar represents the mean + SEM.

**3. Supplemental Reference**

1. **Eick, D., F. Kohhuber, D. A. Wolf, and L. J. Strobl.** 1994. Activation of pausing RNA polymerases by nuclear run-on experiments. *Anal Biochem* **218**:347-51.
